# Supplementary material for: Phytopathological Threats Associated with Quinoa (Chenopodium quinoa Willd.) Cultivation and Seed Production in an Area of Central Italy
Source: MDPI journal article supplement (doi:10.3390/plants10091933), 2021-09-16
Supplement: s1 [file s1]

**Supplementary Table S2.** Isolates of *Peronospora* species used in the phylogenetic analysis and related host, origin and GenBank accession numbers.

| Species                                  | Isolates <sup>1</sup> | Host                             | Origin      | ITS GenBank Accession Numbers |
|------------------------------------------|-----------------------|----------------------------------|-------------|-------------------------------|
| <i>Peronospora boni-henrici</i>          | WU 22886              | <i>Chenopodium bonus-hericus</i> | Austria     | AY198286                      |
|                                          | SOMF 15654            | <i>Chenopodium bonus-hericus</i> | Bulgaria    | EF614952                      |
|                                          | BPI 787221            | <i>Chenopodium bonus-hericus</i> | Germany     | EF614953                      |
|                                          | BPI 787219            | <i>Chenopodium bonus-hericus</i> | Switzerland | EF614954                      |
| <i>Peronospora chenopodii</i>            | 2001 HAL              | <i>Chenopodium hybridum</i>      | Germany     | EF614955                      |
| <i>Peronospora chenopodii-polyspermi</i> | WU 22891              | <i>Chenopodium polyspermum</i>   | Austria     | AY198291                      |
|                                          | BPI 787538            | <i>Chenopodium polyspermum</i>   | Germany     | EF614956                      |
| <i>Peronospora effusa</i>                | BPI 877761            | <i>Spinacia oleracea</i>         | Korea       | DQ643876                      |
| <i>Peronospora farinosa</i> s.l.         | RD 1459               | <i>Atriplex</i> sp.              | Argentina   | EU571109                      |
|                                          | 1962 UPS              | <i>Atriplex</i> sp               | Iceland     | DQ643840                      |
|                                          | BPI 789214            | <i>Atriplex littoralis</i>       | Sweden      | DQ643841                      |
|                                          | 1962 UPS              | <i>Atriplex patula</i>           | Sweden      | DQ643842                      |
| <i>Peronospora manshurica</i>            | KUS-F17669            | <i>Glycine soja</i>              | Korea       | AY211019                      |
| <i>Peronospora variabilis</i>            | RD 90                 | <i>Chenopodium album</i>         | Argentina   | EU571110                      |
|                                          | HMAS 57036            | <i>Chenopodium album</i>         | China       | EF614959                      |
|                                          | BPI 791617            | <i>Chenopodium album</i>         | Germany     | EF614961                      |
|                                          | 1935 UPS              | <i>Chenopodium album</i>         | Ireland     | EF614962                      |
|                                          | BPI 791615            | <i>Chenopodium album</i>         | Italy       | EF614963                      |
|                                          | BPI 791620            | <i>Chenopodium album</i>         | Latvia      | EF614967                      |
|                                          | 2000 UPS              | <i>Chenopodium album</i>         | Romania     | AF465762                      |
|                                          | 1932 UPS              | <i>Chenopodium album</i>         | Netherlands | EF614968                      |
|                                          | RD 1436               | <i>Chenopodium quinoa</i>        | Argentina   | EU571113                      |
|                                          | BPI 788269a           | <i>Chenopodium quinoa</i>        | Bolivia     | EU571108                      |
|                                          | DK03                  | <i>Chenopodium quinoa</i>        | Denmark     | FJ638473                      |
|                                          | DK04                  | <i>Chenopodium quinoa</i>        | Denmark     | EU113306                      |
|                                          | DK05                  | <i>Chenopodium quinoa</i>        | Denmark     | FJ638474                      |
|                                          | DK06                  | <i>Chenopodium quinoa</i>        | Denmark     | FJ638475                      |
|                                          | DK07                  | <i>Chenopodium quinoa</i>        | Denmark     | FJ638476                      |
|                                          | DK08                  | <i>Chenopodium quinoa</i>        | Denmark     | FJ638477                      |
|                                          | DK10                  | <i>Chenopodium quinoa</i>        | Denmark     | FJ638478                      |
|                                          | DK11                  | <i>Chenopodium quinoa</i>        | Denmark     | FJ638479                      |
|                                          | EC04                  | <i>Chenopodium quinoa</i>        | Ecuador     | EU113303                      |
|                                          | EC05                  | <i>Chenopodium quinoa</i>        | Ecuador     | FJ638491                      |
|                                          | EC11                  | <i>Chenopodium quinoa</i>        | Ecuador     | EU113309                      |
|                                          | PE01                  | <i>Chenopodium quinoa</i>        | Peru        | FJ638496                      |
|                                          | PE02                  | <i>Chenopodium quinoa</i>        | Peru        | EU113304                      |
|                                          | PE03                  | <i>Chenopodium quinoa</i>        | Peru        | FJ638497                      |
|                                          | <b>PV-PG-Q1</b>       | <i>Chenopodium quinoa</i>        | Italy       | <b>MZ191106</b>               |

<sup>1</sup>**BPI**: Systematic Mycology and Microbiology Laboratory, USDA-ARS, Beltsville, Maryland, U.S.A.; **HAL**: Herbarium of Institut für Biologie, Department of Geobotany and Botanical Garden, Martin-Luther-University, Halle, Germany; **HMAS**: Herbarium Mycologium, Institute of Microbiology, Chinese Academy of Sciences, Chaoyang, People's Republic of China; **KUS**: Herbarium of School of Life Sciences, Korea University, Seoul, Republic of Korea; **RD**: R. Delhey (private collections) in the Phytopathology Lab of Bahia Blanca, Argentina; **SOMF**: Mycological Collection, Institute of Biodiversity and Ecosystem Research, Bulgarian Academy of Sciences, Sofia, Bulgaria; **UPS**: Museum of Evolution, Uppsala University, Uppsala, Sweden; **WU**: Herbarium of the Institute of Botany, University of Vienna, Austria. Isolates listed as **DK**, **EC** and **PE** are from Reference [50]. Bold type, isolate and accession number obtained in the present study.
