# Supplementary material for: Phytopathological Threats Associated with Quinoa (Chenopodium quinoa Willd.) Cultivation and Seed Production in an Area of Central Italy
Source: MDPI journal article supplement (doi:10.3390/plants10091933), 2021-09-16
Supplement: s1 [file s1]

**Supplementary Table S1.** Isolates of *Fusarium* species belonging to the *Fusarium incarnatum-equiseti* species complex (FIESC) used in the phylogenetic analysis and related GenBank accession numbers and clade.

| Phylogenetic species     | Isolates   | <i>tef1</i> $\alpha$ GenBank<br>accession numbers | Clade             |
|--------------------------|------------|---------------------------------------------------|-------------------|
| FIESC 1-a                | NRRL 43640 | GQ505667                                          | <i>Equiseti</i>   |
| FIESC 2-a                | NRRL 36401 | GQ505651                                          | <i>Equiseti</i>   |
| FIESC 3-a                | NRRL 36318 | GQ505646                                          | <i>Equiseti</i>   |
| FIESC 4-a                | NRRL 20423 | GQ505593                                          | <i>Equiseti</i>   |
| FIESC 5-a                | NRRL 32871 | GQ505619                                          | <i>Equiseti</i>   |
| FIESC 5-b                | NRRL 45995 | GQ505670                                          | <i>Equiseti</i>   |
| FIESC 5-c                | NRRL 25795 | GQ505597                                          | <i>Equiseti</i>   |
| FIESC 5-d                | NRRL 34035 | GQ505637                                          | <i>Equiseti</i>   |
| FIESC 5-f                | NRRL 45997 | GQ505672                                          | <i>Equiseti</i>   |
| FIESC 6-a                | NRRL 43638 | GQ505665.                                         | <i>Equiseti</i>   |
| FIESC 7-a                | NRRL 32997 | GQ505624                                          | <i>Equiseti</i>   |
| FIESC 8-b                | NRRL 43498 | GQ505658                                          | <i>Equiseti</i>   |
| FIESC 9-c                | NRRL 26922 | GQ505601                                          | <i>Equiseti</i>   |
| FIESC 10-a               | NRRL 3020  | GQ505586                                          | <i>Equiseti</i>   |
| FIESC 11-a               | NRRL 36372 | GQ505649                                          | <i>Equiseti</i>   |
| FIESC 12-c               | NRRL 36393 | GQ505645                                          | <i>Equiseti</i>   |
| FIESC 13-a               | NRRL 43635 | GQ505662                                          | <i>Equiseti</i>   |
| FIESC 14-a               | NRRL 26419 | GQ505599                                          | <i>Equiseti</i>   |
| FIESC 15-b               | NRRL 32182 | GQ505611                                          | <i>Incarnatum</i> |
| FIESC 16-c               | NRRL 43730 | GQ505669                                          | <i>Incarnatum</i> |
| FIESC 17-a               | NRRL 32864 | GQ505613                                          | <i>Incarnatum</i> |
| FIESC 18-a               | NRRL 31167 | GQ505608                                          | <i>Incarnatum</i> |
| FIESC 19-a               | NRRL 43639 | GQ505666.                                         | <i>Incarnatum</i> |
| FIESC 20-a               | NRRL 34003 | GQ505627                                          | <i>Incarnatum</i> |
| FIESC 21-a               | NRRL 13335 | GQ505590                                          | <i>Incarnatum</i> |
| FIESC 22-a               | NRRL 34002 | GQ505626                                          | <i>Incarnatum</i> |
| FIESC 23-a               | NRRL 32867 | GQ505616                                          | <i>Incarnatum</i> |
| FIESC 24-b               | NRRL 43297 | GQ505657                                          | <i>Incarnatum</i> |
| FIESC 25-c               | NRRL 32868 | GQ505617                                          | <i>Incarnatum</i> |
| FIESC 26-b               | NRRL 28714 | GQ505598                                          | <i>Incarnatum</i> |
| FIESC 27-a               | NRRL 20722 | GQ505595                                          | <i>Incarnatum</i> |
| FIESC 28-a               | NRRL 28577 | GQ505603                                          | <i>Incarnatum</i> |
| FIESC 29-a               | NRRL 25084 | JF740715                                          | <i>Equiseti</i>   |
| FIESC 30-a               | NRRL 52758 | JF740833                                          | <i>Equiseti</i>   |
| <b>FIESC-PG-Q1</b>       | -          | <b>MZ191105</b>                                   | <i>Equiseti</i>   |
| <i>Fusarium concolor</i> | NRRL 13459 | GQ505674                                          | -                 |

NRRL: Mycological collection of the National Regional Research Laboratory, Peoria, IL, USA. Bold type, isolate and accession number obtained in the present study.
